# Supplementary material for: Tunable defect-engineered nanohybrid heterostructures: exfoliated 2D WSe2–MoS2 nanohybrid sheet covered on 1D ZnO nanostructures for self-powered UV photodetectors
Source: Royal Society of Chemistry journal article supplement (doi:10.1039/d3tc00844d), 2023-01-01
Supplement: d3tc00844d1.pdf [file d3tc00844d1.pdf]

## Supporting Information

### **Tunable Defect-engineered Nanohybrid Heterostructures: Exfoliated 2D WSe<sub>2</sub>-MoS<sub>2</sub> Nanohybrid Sheet Covered on 1D ZnO Nanostructures for Self-Powered UV Photodetectors**

Adhimoorthy Saravanan<sup>a\*</sup>, Bohr-Ran Huang<sup>a\*</sup>, Deepa Kathiravan<sup>a</sup>, Shikha Sakalley<sup>bc</sup>, Sheng-Chi Chen<sup>cd\*</sup>

<sup>a</sup> Graduate Institute of Electro-Optical Engineering and Department of Electronic and Computer Engineering, National Taiwan University of Science and Technology, Taipei 106, Taiwan.

<sup>b</sup> Department of Mechanical Engineering, National Taiwan University of Science and Technology, Taipei 106, Taiwan.

<sup>c</sup> Department of Materials Engineering and Center for Plasma and Thin Film Technologies, Ming Chi University of Technology, New Taipei city 243, Taiwan.

<sup>d</sup> College of Engineering and Center for Green Technology, Chang Gung University, Taoyuan 333, Taiwan.

\*Corresponding authors:

E-mail addresses: [huangbr@mail.ntust.edu.tw](mailto:huangbr@mail.ntust.edu.tw), [aksaravanan@mail.ntust.edu.tw](mailto:aksaravanan@mail.ntust.edu.tw),  
[chensc@mail.mcut.edu.tw](mailto:chensc@mail.mcut.edu.tw)

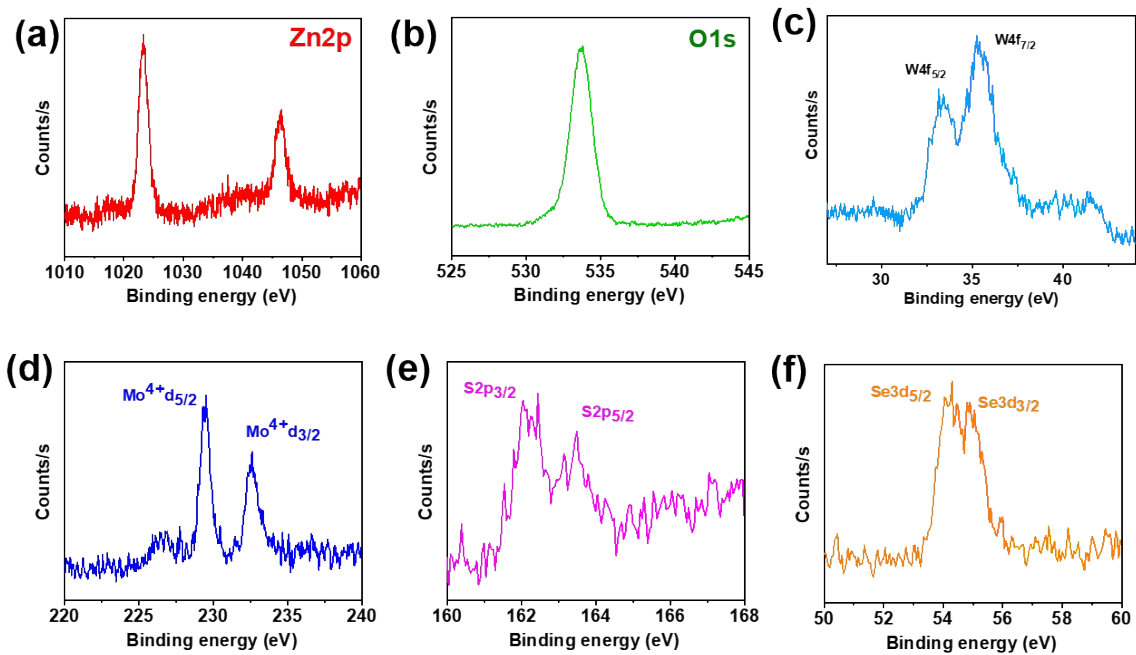

Fig. S1 XPS images of  $\text{WSe}_2 @ \text{MoS}_2(3\text{mL})\text{-ZNRs}$  with different elements (a) Zn2p, (b) O1s, (c) Wf, (d) Mod, (e) S2p and (f) Se3d

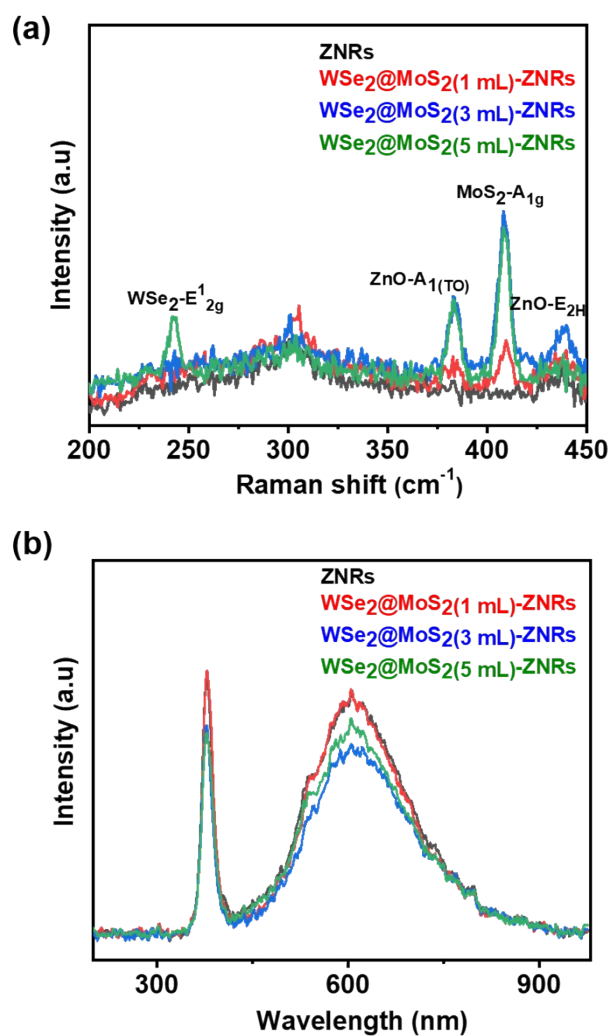

Fig. S2 (a) Raman and (b) PL spectra of ZNRs,  $\text{WSe}_2 @\text{MoS}_2 (1\text{ mL})\text{-ZNRs}$ ,  $\text{WSe}_2 @\text{MoS}_2 (3\text{ mL})\text{-ZNRs}$  and  $\text{WSe}_2 @\text{MoS}_2 (5\text{ mL})\text{-ZNRs}$

Table S1. Statistic current value of the as-fabricated samples

| Voltage | ZNRs     |          | 1ml $\text{WSe}_2 @\text{MoS}_2\text{-ZNRs}$ |          | 3ml $\text{WSe}_2 @\text{MoS}_2\text{-ZNRs}$ |         | 5ml $\text{WSe}_2 @\text{MoS}_2\text{-ZNRs}$ |          |
|---------|----------|----------|----------------------------------------------|----------|----------------------------------------------|---------|----------------------------------------------|----------|
|         | dark     | UV       | dark                                         | UV       | dark                                         | UV      | dark                                         | UV       |
| 1       | 2.49E-07 | 8.87E-05 | 5.28E-08                                     | 2.91E-04 | 9.43E-09                                     | 0.00016 | 5.99E-08                                     | 1.53E-04 |
| 2       | 5.70E-07 | 1.91E-05 | 1.08E-07                                     | 6.68E-04 | 3.04E-08                                     | 0.00216 | 3.13E-07                                     | 4.27E-04 |
| 3       | 9.81E-07 | 2.87E-05 | 1.84E-07                                     | 0.00113  | 9.53E-08                                     | 0.00341 | 6.97E-07                                     | 8.74E-04 |
| 4       | 1.54E-06 | 3.79E-04 | 2.80E-07                                     | 0.00157  | 2.22E-07                                     | 0.00574 | 1.59E-06                                     | 0.00161  |
| 5       | 2.22E-06 | 1.85E-04 | 4.03E-07                                     | 0.0024   | 4.48E-07                                     | 0.00754 | 2.41E-06                                     | 0.00276  |

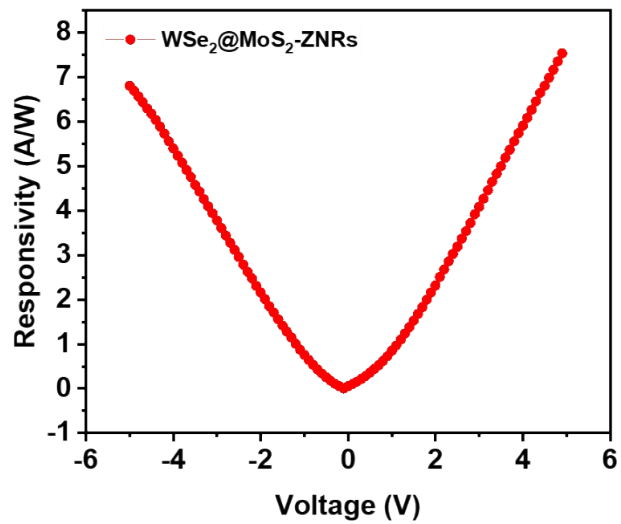

Fig. S3 Responsivity values of the as-fabricated 3ml WSe<sub>2</sub>@MoS<sub>2</sub>-ZNRs sample
